# Supplementary material for: Burden and Risk Factors of Brain Metastases in Melanoma: A Systematic Literature Review
Source: MDPI journal article supplement (doi:10.3390/cancers14246108), 2022-12-12
Supplement: s1 [file s1]

**Supplementary Table S1. Studies reported MBM proportion with brain metastasis occurred at diagnosis (N = 29, 8 excluded from summary Tables 1-2 are italicized)**

| Author, Year                                                                                     | Location/ Country                                               | Study Design                 | Data Source                              | Melanoma Type and Stage                                                                                                                           | No. of Patients (Stage IV only) | No. of Patients with MBM | Proportion of MBM                              |
|--------------------------------------------------------------------------------------------------|-----------------------------------------------------------------|------------------------------|------------------------------------------|---------------------------------------------------------------------------------------------------------------------------------------------------|---------------------------------|--------------------------|------------------------------------------------|
| <i>Studies with cutaneous type or majority cutaneous type mixed with other types of melanoma</i> |                                                                 |                              |                                          |                                                                                                                                                   |                                 |                          |                                                |
| Abdel-Rahman, 2018 [7]                                                                           | United States                                                   | Prospective                  | SEER (2010-distant metastatic)           | Cutaneous, Stage IV                                                                                                                               | 2691                            | 906                      | 33.7%                                          |
| Ahmad, 2015 [8]                                                                                  | United Kingdom                                                  | Retrospective                | EAP: expanded access programmer          | Mixed (82% cutaneous, 8% uveal, 2% mucosal, 3% acral, 5% unknown), 191 patients (99%) had Stage IV, 2 patients (1%) had unresectable Stage III/IV | 191                             | 35                       | 18.3%                                          |
| Arance, 2016 [9]                                                                                 | Spain                                                           | Unknown                      | Single center                            | Mixed, Unresectable stage IIIC or stage IV                                                                                                        | 301                             | 66                       | NA, stage IIIC and IV not separated 39%        |
| Atkinson, 2020 [10]                                                                              | Australia, Netherlands, Spain, Italy, Czech Republic, Lithuania | Retrospective                | Named Patient Program (NPP); DESCRIBE II | Mixed, Unresectable Stage III (7.4%) or Stage IV (92.6%)                                                                                          | 251                             | 99                       |                                                |
| Cowey, 2018 [11]                                                                                 | United States                                                   | Retrospective, observational | The US Oncology Network                  | Mixed, Advanced (134 Stage IV, 34 non-metastatic)                                                                                                 | 134                             | 41                       | 31.0%                                          |
| Cowey, 2019 [12]                                                                                 | United States                                                   | Retrospective, observational | US Oncology Network, iKnowMed            | Mixed, Advanced                                                                                                                                   | 484                             | 155                      | NA, Earlier stages not separated from Stage IV |
| Cybulska-Stopa, 2019 [13]                                                                        | Poland                                                          | Retrospective                | Multicentre                              | Mixed, Skin, mucosal Unresectable or Stage IV                                                                                                     | 318                             | 45                       | NA, Earlier stages not separated               |

|                                  |                      |                      |                                                                                   |                                                                                                                                            |     |     |                                                                         |
|----------------------------------|----------------------|----------------------|-----------------------------------------------------------------------------------|--------------------------------------------------------------------------------------------------------------------------------------------|-----|-----|-------------------------------------------------------------------------|
| <i>Cybulska-Stopa, 2020 [14]</i> | <i>Poland</i>        | <i>Retrospective</i> | <i>Unknown</i>                                                                    | <i>Mixed, Unresectable (Stage III) or Stage IV</i>                                                                                         | 287 | 64  | <i>from Stage IV<br/>NA, Earlier stages not separated from Stage IV</i> |
| Ferguson, 2018 [15]              | Global               | Retrospective        | Global                                                                            | Mixed, Metastatic                                                                                                                          | 761 | 101 | 13.3%                                                                   |
| Guida, 2018 [16]                 | Italy                | Phase II trial       | Gruppo Oncologico Italia Meridionale                                              | Mixed [Skin (58), Uveal (3), Mucosal (2), Unknown (6)], Stage IV                                                                           | 69  | 10  | 14.5%                                                                   |
| Helgadottir, 2019 [17]           | Sweden               | Familial follow-up   | Unknown                                                                           | Cutaneous, Stage IV                                                                                                                        | 19  | 5   | 26.3%                                                                   |
| Kim, 2018 [18]                   | Australia            | Cohort               | Pharmaceutical Benefits Scheme listing                                            | Mixed, Stage IV                                                                                                                            | 910 | 262 | 28.8%                                                                   |
| <i>Liu, 2019 [19]</i>            | <i>United States</i> | <i>Retrospective</i> | <i>Flatiron Health cloud-based longitudinal database</i>                          | <i>Cutaneous, Advanced (Stage III or IV)</i>                                                                                               | 532 | 96  | <i>NA, Earlier stages not separated from Stage IV</i>                   |
| Mangana, 2017 [20]               | Switzerland          | Retrospective cohort | Multicenter                                                                       | Mixed [SSM (47), NMM (80), ALM (16), LNM (4), desmoplastic (3), amelanotic (7), mucosal (8), other (11), uveal (1), unknown (88)] Stage IV | 395 | 61  | 15.4%                                                                   |
| <i>Moțățăianu, 2019 [21]</i>     | <i>Romania</i>       | <i>Cohort</i>        | <i>1st Clinic of Neurology, Emergency County Hospital of Targu Mures, Romania</i> | <i>Mixed, Stage IV (3), or Non-metastatic – specific staging information not provided (18)</i>                                             | 21  | 8   | <i>NA, Earlier stages not separated from Stage IV</i>                   |
| Parakh, 2019 [22]                | Australia            | Retrospective        | Unknown                                                                           | Mixed, Stage IV                                                                                                                            | 45  | 14  | 31.1%                                                                   |
| Rovere, 2016 [41]                | Brazil               | Cross-sectional      | Single center                                                                     | Cutaneous, Stage IV                                                                                                                        | 46  | 14  | 30.4%                                                                   |

|                                           |               |               |                                                                                              |                                                                                                                                         |                      |                     |                                |
|-------------------------------------------|---------------|---------------|----------------------------------------------------------------------------------------------|-----------------------------------------------------------------------------------------------------------------------------------------|----------------------|---------------------|--------------------------------|
|                                           |               | retrospective |                                                                                              |                                                                                                                                         |                      |                     |                                |
| Funck-Brentano, 2020 [23]                 | France        | Cohort        | Single center                                                                                | Mixed[SSM (6), nodular (5), lentigo maligna (2), acral (1), desmoplastic (2), regressive (2), indeterminate (3), unknown (2)], Stage IV | 26                   | 4                   | 15.4%                          |
| Wang, 2017 [24]                           | United States | Cohort        | Multicenter (Dana Farber Cancer Institute, Moffitt Cancer Center, Vanderbilt Medical Center) | Mixed [Cutaneous (33), acral (2), mucosal (1), unknown (1), Stage IV                                                                    | 36                   | 9                   | 25.0%                          |
| Gorka, 2016 [25]                          | Hungary       | Retrospective | Single Center                                                                                | Mixed, Non-metastatic at diagnosis                                                                                                      | 2972                 | 333                 | NA, tumor stages not specified |
|                                           |               |               |                                                                                              |                                                                                                                                         | 225                  | 65                  | 28.9%                          |
| Omodaka, 2018 [28]                        | Japan         | Retrospective | Shinshu University Hospital                                                                  | Mixed, Stage IV                                                                                                                         | 12                   | 3                   | 25.0%                          |
| Sandhu, 2021 [43]                         | United States | Retrospective | Yale-New Haven Hospital tumor registry                                                       | Cutaneous vs. Mixed not described, presume cutaneous                                                                                    | 106 (Stage IV at Dx) | 40 (Stage IV at Dx) | 37.7%                          |
| Zaragoza, 2016 [29]                       | France        | Cohort        | Unknown                                                                                      | Mixed, unresectable Stage III (1) or Stage IV (57)                                                                                      | 57                   | 15                  | 26.3%                          |
| Zhang, 2019 <sup>a</sup> [30]             | China         | Retrospective | Affiliated Cancer Hospital of ZhengZhou University                                           | Cutaneous, Advanced - Stage III (40) or Stage IV (80)                                                                                   | 80                   | 10                  | 12.5%                          |
| Kirchberger, 2018 <sup>a</sup> [31]       | Germany       | Retrospective | University Erlangen                                                                          | Cutaneous, Stage IV                                                                                                                     | 24                   | 10                  | 41.7%                          |
| <i>Studies on other types of melanoma</i> |               |               |                                                                                              |                                                                                                                                         |                      |                     |                                |

|                                     |               |                      |                                                    |                                                                                                            |     |   |                                                |
|-------------------------------------|---------------|----------------------|----------------------------------------------------|------------------------------------------------------------------------------------------------------------|-----|---|------------------------------------------------|
| Jochems, 2019 [32]                  | Netherlands   | Cohort               | Dutch Melanoma Treatment Registry                  | Uveal, Stage IV                                                                                            | 175 | 3 | 1.7%                                           |
| Shoushtari, 2017 [33]               | United States | Retrospective cohort | Single institution                                 | Mucosal, Unresectable and locally advanced (13) or Stage IV (68)                                           | 68  | 5 | 7.4%                                           |
| Chae, 2020 [34]                     | Korea         | Unknown              | Unknown                                            | Oral mucosal, Stage IV (35) or Advanced (39)                                                               | 74  | 7 | NA, Earlier stages not separated from Stage IV |
| Wu, 2020 [42]                       | Taiwan        | Retrospective        | Linkou Chang Gung Memorial Hospital                | Mixed [Acral (27), cutaneous (14), mucosal (20), others (10), unknown (9)], Stage III (7) or Stage IV (73) | 80  | 5 | 6.3%                                           |
| Kirchberger, 2018 <sup>a</sup> [31] | Germany       | Retrospective        | University Erlangen                                | Uveal, Stage IV                                                                                            | 9   | 1 | 11.1%                                          |
| Zhang, 2019 <sup>a</sup> [30]       | China         | Retrospective        | Affiliated Cancer Hospital of ZhengZhou University | Mucosal, Stage III (13) or Stage IV (28)                                                                   | 28  | 4 | 14.3%                                          |

---

<sup>a</sup>Kirchberger 2018 reported the proportion in the cutaneous type and uveal type separately. Zhang 2019 reported the proportion in the cutaneous type and mucosal type separately.

**Supplementary Table S2. Studies reported MBM proportion with brain metastasis occurred after diagnosis (N = 9, 3 excluded from summary Tables 1-2 are italicized)**

| Author, Year                  | Location/ Country                                                                                    | Study Design                             | Data Source                                                                                         | Melanoma Type and Stage                                                                                                                               | No. of Patients                              | No. of Patients with MBM                    | Proportion of MBM                                                                    |
|-------------------------------|------------------------------------------------------------------------------------------------------|------------------------------------------|-----------------------------------------------------------------------------------------------------|-------------------------------------------------------------------------------------------------------------------------------------------------------|----------------------------------------------|---------------------------------------------|--------------------------------------------------------------------------------------|
| <i>Chang, 2016 [36]</i>       | <i>United States</i>                                                                                 | <i>Prospective</i>                       | <i>NYU Interdisciplinary Melanoma Cooperative Group Clinicopathologic Biorepository</i>             | <i>Mixed, Unresectable Stage IIIC or Stage IV</i>                                                                                                     | <i>31</i>                                    | <i>12</i>                                   | <i>NA, stage III and IV not separated</i>                                            |
| Hanniford, 2015 [26]          | United States                                                                                        | Retrospective cohort                     | Single center (Interdisciplinary Melanoma Cooperative Group database of NYU Langone Medical Center) | Cutaneous, Stages I-IV followed over time for development of brain metastases – Stage I (74) - Excluded, Stage II (111), Stage III (69), Stage IV (2) | 2 (Stage IV); 69 (Stage III); 111 (Stage II) | 2 (Stage IV); 27 (Stage III); 28 (Stage II) | 100% (Stage IV); 39.1% (Stage III); 25.2% (Stage II)                                 |
| <i>Koelblinger, 2019 [37]</i> | <i>Europe (University Hospital of Zurich, Switzerland and Medical University, Salzburg, Austria)</i> | <i>Unknown</i>                           | <i>Multicenter</i>                                                                                  | <i>Mixed - SSM (45), Nodular (48), Acrolentiginous (5), other (14) Non-metastatic (Stage pT1-pT4)</i>                                                 | <i>56</i>                                    | <i>10</i>                                   | <i>NA, tumor stages were not specified, only pathologic stage (pT1-pT4) reported</i> |
| Larkin, 2019 [38]             | Europe, North America, Latin America, Australia, South Africa, India, South Korea                    | trial, ClinicalTrials.gov (NCT01307397). | Multicenter                                                                                         | Mixed, Unresectable stage IIIC (2%) or Stage IV (98%)                                                                                                 | 3219                                         | 753                                         | NA, stage IIIC and IV not separated                                                  |

|                     |                       |                              |                                                        |                                                                                                                                                                                                                              |                                |                               |                                     |
|---------------------|-----------------------|------------------------------|--------------------------------------------------------|------------------------------------------------------------------------------------------------------------------------------------------------------------------------------------------------------------------------------|--------------------------------|-------------------------------|-------------------------------------|
| Maxwell, 2017 [27]  | United States         | Retrospective cohort         | Single center (Johns Hopkins Hospital Cancer Registry) | Mixed [Nodular (44), SSM (34), Acral/mucosal lentiginous (5), Other (14), Unknown (128), Stage 0-II (62)- Excluded, Stage III (72), IV (36), Unknown (55) and MBM numbers at any time during clinical course]                | 36 (Stage IV); 28 (Stage III)  | 16 (Stage IV); 14 (Stage III) | 44.4% (Stage IV); 50% (Stage III)   |
| Nakamura, 2020 [35] | Japan                 | Retrospective                | Single institution, University of Tsukuba              | Mixed [Acral (20), Superficial spreading melanoma (21), mucosal melanoma (20)], Unresectable stage II (4), Unresectable stage III (9), Adjuvant Stage III (2), or Stage IV (49) – MBM numbers developed during immunotherapy | 49 (Stage IV only)             | 7                             | 14.3%                               |
| Richtig, 2018 [39]  | Austria               | Retrospective, observational | Multicenter                                            | Mixed, Stage IV                                                                                                                                                                                                              | 76                             | 16                            | 21.1%                               |
| Sandhu, 2021 [43]   | United States         | Retrospective                | Single Center (Yale-New Haven Hospital tumor registry) | Cutaneous vs. Mixed not described, presume cutaneous                                                                                                                                                                         | 66 (Stage IV); 170 (Stage III) | 15 (Stage IV); 39 (Stage III) | 22.7% (Stage IV); 22.9% (Stage III) |
| Valpione, 2018 [40] | Europe, US, Australia | Retrospective                | Multicenter                                            | Mixed, Metastatic                                                                                                                                                                                                            | 116                            | 51                            | 44.0%                               |

**Supplementary Table S3. Studies reported risk factors associated with MBM development**

| Author, Year                 | Location/<br>Country                                                                                                  | Study<br>Design                      | Data<br>Source                                                           | Melanoma Type and<br>Stage (No. of<br>patients)                                                                                                                                                                                                                    | Studied Risk Factors                                                                                                                          |
|------------------------------|-----------------------------------------------------------------------------------------------------------------------|--------------------------------------|--------------------------------------------------------------------------|--------------------------------------------------------------------------------------------------------------------------------------------------------------------------------------------------------------------------------------------------------------------|-----------------------------------------------------------------------------------------------------------------------------------------------|
| Abdel-<br>Rahman 2018<br>[7] | United States                                                                                                         | Prospective                          | SEER<br>(2010-<br>2013)                                                  | Cutaneous,<br>Stage IV (N = 2691)                                                                                                                                                                                                                                  | Gender, laterality, age,<br>histology, T-stage, N-<br>stage, serum LDH, race                                                                  |
| Gardner 2017<br>[45]         | United States                                                                                                         | Case-control                         | Melanoma<br>Clinical<br>Cancer<br>Database                               | Cutaneous, Stage IV<br>(N = 360)                                                                                                                                                                                                                                   | Gender, Breslow depth,<br>ulceration, age, primary<br>tumor location,<br>histology, family<br>history of melanoma,<br>BRAF status             |
| Koelblinger<br>2019 [37]     | Europe<br>(University<br>Hospital of<br>Zurich,<br>Switzerland<br>and Medical<br>University,<br>Salzburg,<br>Austria) | Retrospective                        | Multicente<br>r                                                          | Mixed - SSM (45),<br>Nodular (48),<br>Acrolentiginous (5),<br>other (14)<br>Non-metastatic<br>(Stage pT1-pT4) (N =<br>56 )                                                                                                                                         | Ulceration                                                                                                                                    |
| Liu 2019 [44]                | United States                                                                                                         | Retrospective                        | SEER<br>(2010-<br>2014)                                                  | Cutaneous,<br>All Stages (N = 62369)                                                                                                                                                                                                                               | Gender, marital status,<br>health insurance, bone<br>metastases, liver<br>metastases, lung<br>metastases, surgery to<br>primary site, race    |
| Maxwell<br>2017 [27]         | United States                                                                                                         | Retrospective<br>cohort              | Single<br>center<br>(Johns<br>Hopkins<br>Hospital<br>Cancer<br>Registry) | Mixed [Nodular (N=<br>44), SSM (N= 34),<br>Acral/mucosal<br>lentiginous (N= 5),<br>Other (N= 14),<br>Unknown (N= 128),<br>Stage 0-II (N= 62),<br>Stage III (N= 72), IV<br>(N= 36), Unknown<br>(N= 55) and MBM<br>numbers at any time<br>during clinical<br>course] | Gender, ulceration,<br>laterality, primary<br>tumor location,<br>histology, AJCC stage,<br>regional lymph node<br>involvement, BRAF<br>status |
| Richtig 2018<br>[39]         | Austria                                                                                                               | Retrospective<br>, ob<br>servational | Multicente<br>r                                                          | Mixed,<br>Stage IV (N= 76)                                                                                                                                                                                                                                         | BMI                                                                                                                                           |

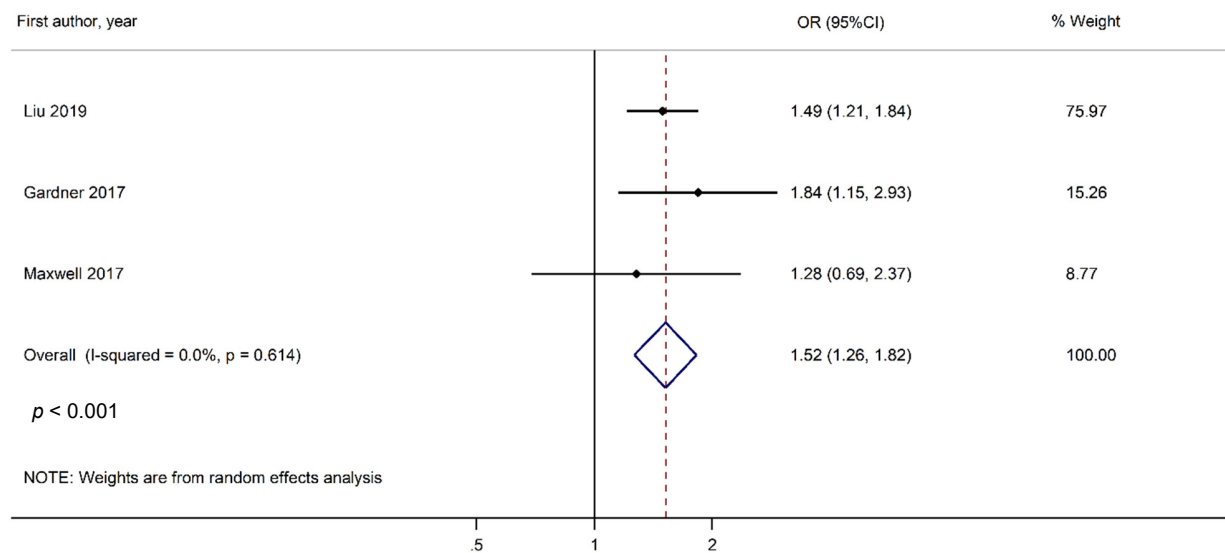

**Supplementary Figure S1.** Meta-analysis of Association Between Gender (Male vs. Female) and Risk of MBM



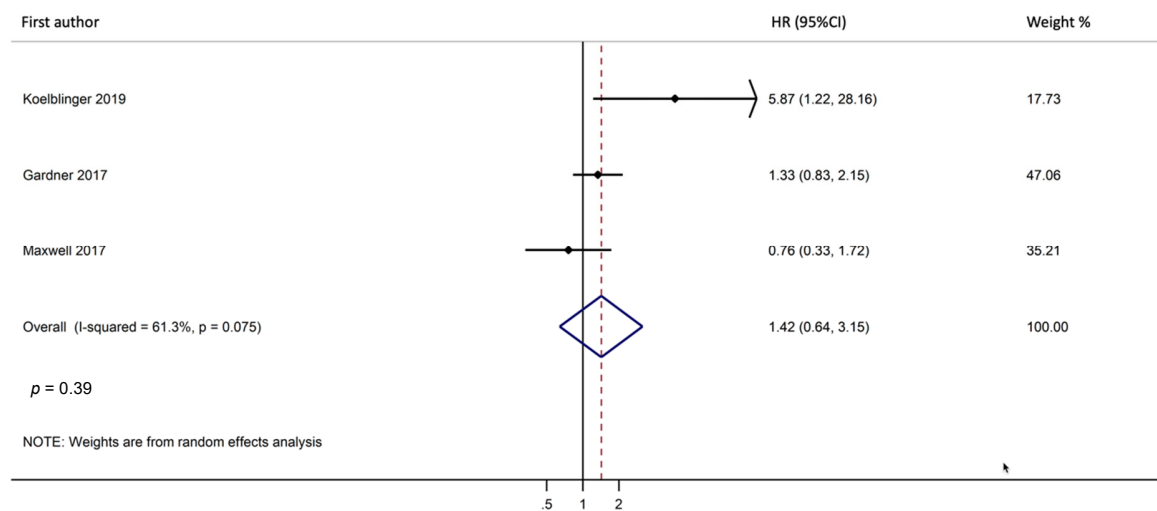

**Supplementary Figure S2.** Meta-analysis of Association Between Ulceration (Presence vs. Absence) and Risk of MB

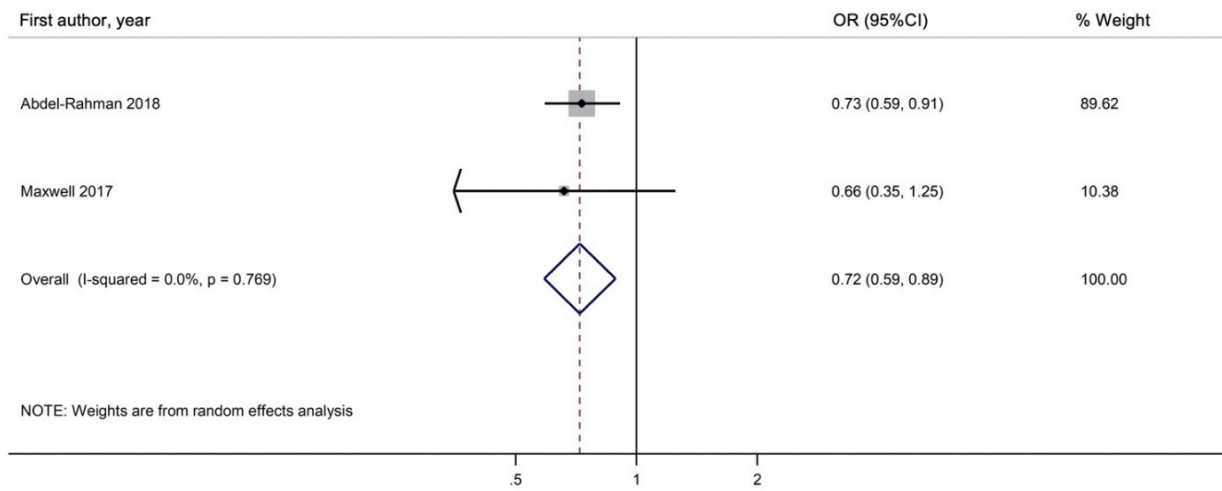

**Supplementary Figure S3.** Meta-analysis of Association Between Laterality (Right vs. Left) and Risk of MBM
